# Supplementary material
Source: bioRxiv or medRxiv preprint supplement (https://medrxiv.org/highwire/filestream/91890/field_highwire_adjunct_files/0/2020.07.31.20165761-1.pdf)
Supplement: Supplementary file [file 2020.07.31.20165761-1.pdf]

## Supplemental Information

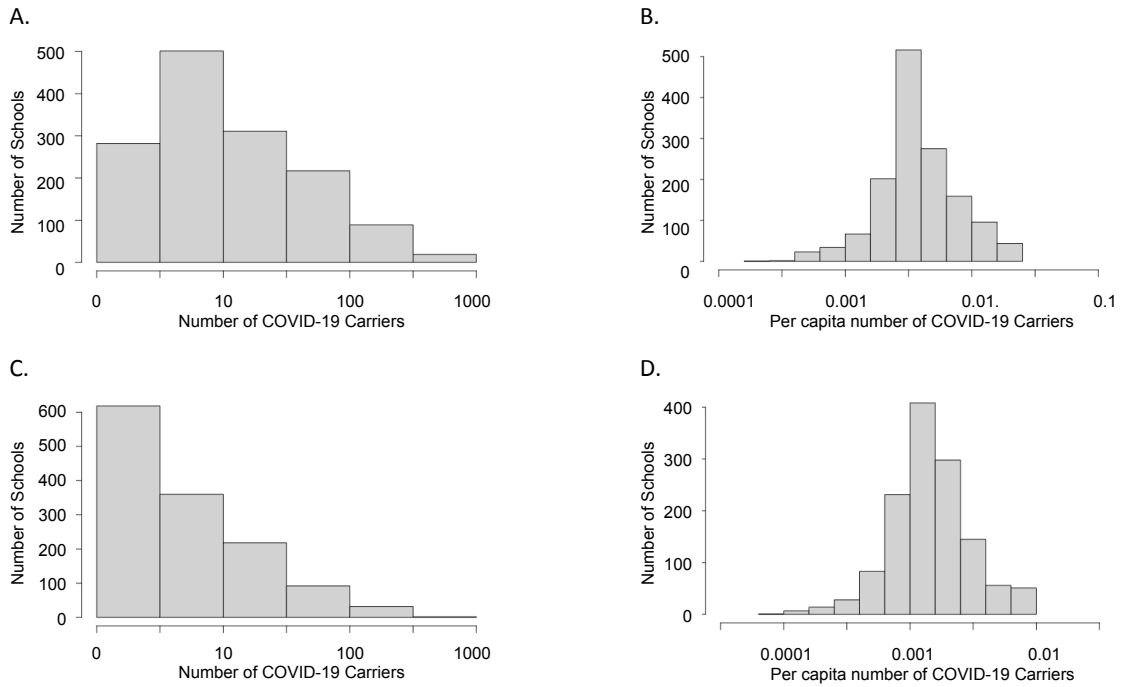

Figure S1: Summary histograms showing infection rates for the ‘Current Projection’ model (A,B) and the ‘Universal Masks’ model (C,D)

A. Absolute (Current Projection)

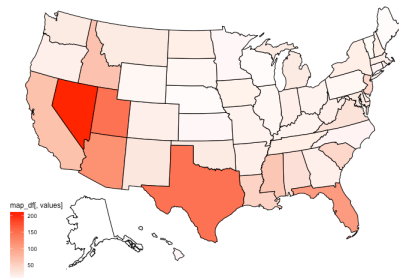

B. Per capita (Current Projection)

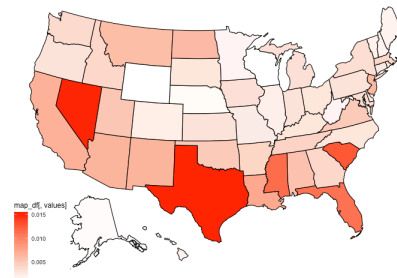

C. Absolute. (Universal Masks)

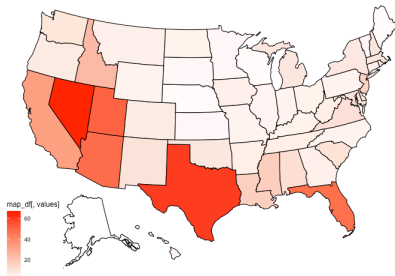

D. Per capita (Universal Masks)

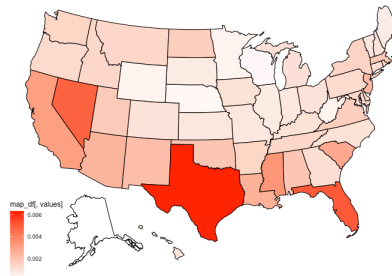

Figure S2: Summary maps showing infection rates for the ‘Current Projection’ model (A,B) and the ‘Universal Masks’ model (C,D)

A.

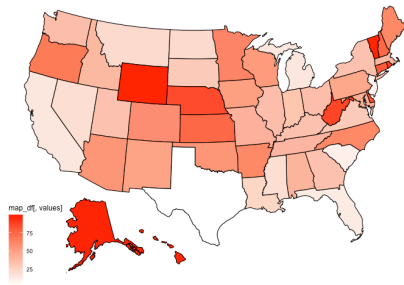

B.

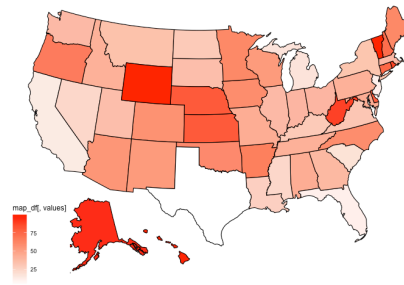

Figure S3: Summary maps showing the percentage of infections that are out-of-state for the ‘Current Projection’ model (A) and the ‘Universal Masks’ model (B)
